# 1 DETECTION OF *Wolbachia* IN FIELD-COLLECTED MOSQUITO VECTOR, *Aedes* 2 *aegypti*

3 Thaddeus M. Carvajal<sup>1,2,3\*</sup>, Kazuki Hashimoto<sup>1</sup>, Reza Kurniawan Harnandika<sup>1</sup>, Divina M  
4 Amalin<sup>2,3</sup> and Kozo Watanabe<sup>1,2,3</sup>

5 <sup>1</sup> Department of Civil and Environmental Engineering - Ehime University, Matsuyama,  
6 Japan

7 <sup>2</sup> Biology Department – De La Salle University, Taft Ave Manila, Philippines

8 <sup>3</sup> Biological Control Research Unit, Center for Natural Science and Environmental Research  
9 - De La Salle University, Taft Ave Manila, Philippines

10 \*corresponding author: [tads.carvajal@gmail.com](mailto:tads.carvajal@gmail.com)

## 11 ABSTRACT

12 It was the impression from past literature that *Wolbachia* is not naturally found in *Ae. aegypti*.  
13 However, there are have been reports that recently reveals the presence of this endosymbiont  
14 in this mosquito vector. With this, our study presents additional support of *Wolbachia*  
15 infection in *Ae. aegypti* by screening field-collected adult mosquitoes using *Wolbachia*-  
16 specific 16S rDNA and its surface protein (*wsp*) makers under optimized PCR conditions.  
17 From a total of 672 *Ae. aegypti* adult mosquito samples collected in Metropolitan Manila,  
18 Philippines, 113 (16.8%) and 89 (13.2%) individual mosquito samples were determined to  
19 be *Wolbachia* infected using the *wsp* and 16S rDNA markers, respectively. The *Ae. aegypti*  
20 *wsp* sample sequences were similar or identical to five known *Wolbachia* strains belonging  
21 to supergroups A or B while majority of 16S rDNA sample sequences were similar to strains  
22 belonging to supergroup B. Overall, 80 (11.90%) individual mosquito samples revealed to  
23 show positive amplifications in both markers and 69.0% showed congruence in supergroup  
24 identification (supergroup B). Our findings illustrate that the infection status of *Wolbachia*  
25 in *Ae. aegypti* may appear common than previously recognized.

## INTRODUCTION

Mosquitoes are considered to be medically important insects because of their capacity to carry notable human disease pathogens<sup>1</sup>. Among the known mosquito vectors, *Aedes aegypti* is an efficient and dangerous mosquito vector because of its ability to carry significant arboviral diseases such as Dengue, Chikungunya, Yellow Fever and Zika<sup>2,3</sup>. Despite the development of vaccines, these arboviral diseases are considered to be the leading cause of global disease burden<sup>4</sup> and thus, targeting the mosquito vector is deemed to be the primary control and prevention. A considerable number of vector control strategies had been implemented, but the disease burden continues to increase. Novel and newer approaches are being developed that shows promising outcomes in vector and disease control and one of which is the utilization of the intracellular bacterial endosymbiont, *Wolbachia*<sup>7-9</sup>.

*Wolbachia* is a naturally occurring endosymbiont which can be maternally inherited and cause different reproductive alterations in its host to increase their transmission to the next generation<sup>10-12</sup>. In insects, it is estimated to be naturally present in 60-65% of known species<sup>13</sup>. As to date, there are 17 identified major clades or supergroups (A-Q) where a majority are known to infect arthropods such as insects, arachnids, and crustaceans<sup>14</sup>. The pathogenic effects of *Wolbachia* in its host are well-studied and determined to cause sperm-egg incompatibility, parthenogenesis, cytoplasmic incompatibility, and feminization<sup>11,15</sup>. Therefore, utilizing these effects towards medically-important mosquito vectors, such as *Ae. aegypti*, has taken great research strides in the past two decades. The discovery of a virulent *Wolbachia* strain (wMelPop) in *Drosophila melanogaster* was successfully transferred to *Ae. aegypti* where it reduced the lifespan of the mosquito vector<sup>16-18</sup>. In addition to this, wMelPop and other *Wolbachia* strains (e.g., wMel) were able to demonstrate conferring resistance on a wide range of insect viruses, especially to human viral pathogens, such as dengue and chikungunya<sup>19-22</sup>. The life-shortening capability plus pathogen interference of this *Wolbachia* strain opened an avenue for its potential use as a biological control agent approach against mosquito-borne diseases. The World Mosquito Program (<https://www.worldmosquitoprogram.org>), formerly known as the Eliminate Dengue Project,

was able to generate stable *Wolbachia*-infected *Ae. aegypti* lines that possessed the ability of pathogen interference from dengue viruses under laboratory conditions. These *Wolbachia* strains showed maternal transmission rates close to 100% and induced high levels of cytoplasmic incompatibility to *Ae. aegypti*<sup>16</sup>. Semi-field cage experiments were also conducted to assess the fitness cost effect of the discovered strain towards the mosquito vector and its ability of these strains to invade the mosquito population. These experiments demonstrated the true potential of the endosymbiont because of the reduced fecundity of *Wolbachia*-infected *Ae. aegypti* as compared to the uninfected wildtype<sup>22</sup>. Australia became the first country to release these *Wolbachia*-infected *Ae. aegypti* into the wild population where it exhibited promising results<sup>23,24</sup>. As to date, this methodological strategy against the mosquito vector, *Ae. aegypti*, is now being tested in eight dengue-endemic countries such as Indonesia, Vietnam, Colombia, and Brazil (<https://www.worldmosquitoprogram.org>). It claimed this approach is considered to be cost-effective and safer for the environment than conventional insecticide-based measures<sup>19,25</sup>.

With the recognition of about 65% of known insects to be naturally infected with *Wolbachia* including those mosquito species from the genera of *Aedes*, *Culex*, *Mansonia*, major mosquito vectors of diseases such as *Ae. aegypti* and Anopheline mosquitoes were reported not to possess this endosymbiont<sup>26-31</sup>. It led to the belief that the presence of *Wolbachia* endosymbiont could be the reason why many of the mosquito species are considered to be weak vectors<sup>23</sup>. Nonetheless, more recent studies show evidence that *Wolbachia* infection in *Ae. aegypti* and *Anopheles gambiae* may appear to be more common than it was previously recognized. Natural *Wolbachia* infections have now been reported in adult, larvae and egg populations of *An. gambiae*<sup>32-34</sup>.

Lately, studies have reported detecting *Wolbachia* from field-collected *Ae. aegypti* samples using either *wsp* marker<sup>35</sup> or 16S metabarcoding<sup>36-37</sup>. Though these studies are commendable, there were still uncertainties in establishing whether the mosquito vector does harbor naturally the endosymbiont. Although metabarcoding studies had a substantial sample size (n=85-270), there were unable to report an accurate estimate of the infection rate because

mosquito adult or larval samples were pooled from each location. In contrast, *wsp* detection in *Ae. aegypti* larval samples<sup>35</sup> were screened individually, thus, was able to report the infection rate (50.0%). However, it was difficult to affirm or ascertain its true prevalence since the sample size was small (n=16 individuals). Moreover, there is possibility of a potential bias in reporting a high infection rate if larval samples were collected from the same water container due to the sampling of mosquito siblings from the same female mosquito. Nevertheless, these studies further suggest the likelihood of *Wolbachia* to be naturally associated with *Ae. aegypti*, thus, opening an avenue to re-visit or re-examine its infection status.

Our study aims to present additional support of *Wolbachia* infection found from field-collected *Ae. aegypti* adult mosquitoes using *Wolbachia*-specific 16S rDNA and the *Wolbachia* surface protein (*wsp*) markers. Based on the limitations presented from previous studies, two considerations were applied in addressing these gaps. First, *Wolbachia* screening was done over a large sample size (n=672) and used an individual-based detection of adult *Ae. aegypti* mosquitoes to gain a better estimate of its prevalence in this mosquito vector. Secondly, two molecular markers were used to confirm the detection status and infer the type of *Wolbachia* strains found in *Ae aegypti*.

## METHODS

### Study area and Mosquito collection

The study area is the National Capital Region of the Philippines or also known as Metropolitan Manila. Located on the Eastern shore of Manila Bay in Southwestern Luzon Island (14°50' N Latitude, 121°E Longitude), it is considered to be one of the highly urbanized and densely populated areas in the Philippines. Dengue disease is endemic in this region where it accounts for 15%-25% of the total number of reported Dengue cases annually in 2009 - 2014<sup>38</sup>. Vector control programs are being implemented in various localities of the region. Insecticide application and cleaning of the surroundings have been extensively used however its effectiveness is in question because of the constant and unchanging burden of

the disease. As to date, the Philippines, especially Metropolitan Manila, has never conducted any *Wolbachia*-based program against *Ae. aegypti*.

Adult mosquito samples were collected using a commercial branded mosquito UV-light trap (Jocanima®) installed in the outdoor premises of 138 residential households (sampling sites) from May 2014 – January 2015 (Figure 1a). Collected samples were then sorted and identified as *Ae. aegypti* using available keys<sup>39</sup>. Each sample was then placed in a tube with 99.5% ethanol for preservation. A total of 672 *Ae. aegypti* adult mosquito samples were collected, identified, labeled accordingly (See Supplementary Table 1) and stored at -20°C for subsequent processing.

#### DNA Extraction, Polymerase Chain Reaction, and Sequencing

Total genomic DNA of each mosquito individual was extracted using the QIAGEN Blood and Tissue DNEasy Kit© following a modified protocol<sup>40</sup>. Our study used two molecular markers for detecting *Wolbachia* infection namely; *wsp*<sup>41</sup> and 16S rDNA<sup>42</sup>. The primer sequences are as follows: *wsp* 81F (5'TGG TCC AAT AAG TGA TGA AGA AAC) and *wsp* 691R (5' AAA AAT TAA ACG CTA CTC CA) for *wsp* marker while *Wspecf* (AGC TTC GAG TGA AAC CAA TTC) and *Wspecr* (GAA GAT AAT GAC GGT ACT CAC) for 16S rDNA.

For *wsp* gene amplification, we followed the standard *wsp* protocol<sup>30</sup> where the suggested annealing temperature and number of cycles were 55 °C and 30 cycles respectively. In order to conduct an individual-based detection, we initially performed this protocol in *Culex quinquefasciatus* as our positive control. Certain modifications were made in the standard protocol based on the results where the annealing temperature was set to 57 °C and the number of cycles increased to 35 cycles. This initial modified protocol was performed in individual *Ae. aegypti* samples where it yielded positive faint bands. It prompted us to re-modify again the protocol where the annealing temperature is set at 59 °C with 40 cycles and the addition of 10% DMSO (Sigma-Aldrich®) that led to desirable results necessary for sequencing. Therefore, a 10 µl final reaction volume was used and composed of 10X buffer (TAKARA®), 25 mM MgCl<sub>2</sub>, 10 mM of each dNTPs, 10 µM forward and reverse primers,

10% DMSO (Sigma-Aldrich®) and 5.0U/  $\mu$ l of *Taq* DNA polymerase (TAKARA®). The final thermal profile consisted an initial denaturation of 95°C for 3 minutes, followed by another denaturation temperature of 95°C for 1 minute, an annealing temperature of 59°C for 1 minute and an extension temperature of 72°C for 1 minute for 40 cycles, and accompanied by a final extension temperature at 72°C for 3 minutes.

On the other hand, 16S rDNA gene amplification used a 10  $\mu$ l final reaction volume and composed of 10X buffer (TAKARA), 25 mM MgCl<sub>2</sub>, 10 mM of each dNTPs, 10  $\mu$ M forward and reverse primers, 10% DMSO (Sigma-Aldrich®) and 5.0U/  $\mu$ L of *Taq* DNA polymerase (TAKARA®). Thermal profiles follow the protocol of Simões et al<sup>42</sup> with initial denaturation temperature at 95°C for 2 minutes, followed by two cycles of 95°C for 2 minutes of denaturation, annealing temperature of 60°C for 1 minutes and extension temperature of 72°C for 1 minute, afterwards 35 cycles of denaturation of 95°C for 30 seconds, annealing temperature of 60°C for 1 minute and extension temperature of 72°C for 45 seconds and final extension at 72°C for 10 minutes.

All PCR amplification experiments included positive and negative controls. The positive control is a *Wolbachia*-infected *Cu. quinquefasciatus* sample while the negative control consisted of water as the template. The product size of each molecular marker was checked through electrophoresis with 1.5% agarose gel set at 100 volts for 30 minutes. The size of the amplified *wsp* gene is 610 bp while the 16S rDNA gene is 438 bp. PCR amplification process underwent two replicates to validate the results obtained (See Supplementary Table 1). A third screening was performed for selected individual samples that had conflicting results based on the two prior replicates. Therefore, the criteria set in reporting the certainty for *Wolbachia* infection is based on two successful amplification of the molecular markers. Amplified PCR products from each molecular marker were sent for sequencing to Eurofins, Operon – Tokyo.

## Identity of *Wolbachia* strains and their positions in phylogroups

All sequences were subjected to the Nucleotide Basic Local Alignment Search Tool (BLAST) and compared to deposited *Wolbachia* sequences in GENBANK. Next, selected sequences of *Wolbachia* strains (Table 1) and those obtained in the study underwent multiple alignment using Clustal W in MEGA 6<sup>43</sup>. After editing, the final length used for phylogenetic inference analyses was 398 bp and 732 bp for *wsp* and 16S rDNA respectively. The identities and relationships of the *Wolbachia* strains obtained in our study were determined by performing the Bayesian method in PhyML 3.0 software with 1000 bootstrap replicates<sup>44</sup>. The Smart Model Selection<sup>45</sup> was also utilized to set the parameters for *wsp* as GTR+G (number of estimated parameters  $k = 232$ , Akaike Information Criterion (AIC) = 4897.31702) and 16S rDNA as GTR+G+1 (number of estimated parameters  $k = 207$ , Akaike Information Criterion (AIC) = 5332.88688). All sample sequences were submitted to GENBANK with Accession numbers \_\_\_\_\_ - \_\_\_\_\_.

## Statistical Analysis

A Clark-Evans test was performed to determine if the spatial distribution of *Wolbachia*-positive mosquito samples from each molecular marker have a pattern of complete spatial randomness. The test uses the aggregation index ( $R$ ) where a value of  $> 1$  suggests an ordered distribution and a value of  $< 1$  suggests clustering. This analysis was performed using R program version 3.3.5<sup>46</sup> under package *spatstat* <sup>46</sup>

**Table 1.** Representative *Wolbachia* type sequences from different insect hosts in *wsp* and 16S rDNA molecular markers.

| <b>Molecular Marker</b> | <b>Host</b>                            | <b>Wolbachia supergroup</b> | <b>Accession Number</b> |
|-------------------------|----------------------------------------|-----------------------------|-------------------------|
| wsp                     | <i>Drosophila melanogaster</i>         | A                           | AF020072                |
|                         | <i>Aedes albopictus</i>                | A                           | AF020058                |
|                         | <i>Glossina morsitans</i>              | A                           | AF020079                |
|                         | <i>Drosophila simulans</i> (Riverside) | A                           | AF020070                |
|                         | <i>Muscidifurax uniraptor</i>          | A                           | AF020071                |
|                         | <i>Phlebotomus papatasi</i>            | A                           | AF020082                |
|                         | <i>Glossina austeni</i>                | A                           | AF020077                |
|                         | <i>Culex pipiens</i>                   | B                           | AF020061                |
|                         | <i>Culex quinquefasciatus</i>          | B                           | AF020060                |
|                         | <i>Aedes albopictus</i>                | B                           | AF020059                |
|                         | <i>Ephesia cautella</i>                | B                           | AF020076                |
|                         | <i>Dirofilaria immitis</i>             | C (Outgroup)                | AJ252062                |
| 16S                     | <i>Nasonia longicornis</i>             | A                           | M84691                  |
|                         | <i>Muscidifurax uniraptor</i>          | A                           | L02882                  |
|                         | <i>Aedes albopictus</i>                | B                           | KX155506                |
|                         | <i>Culex pipiens</i>                   | B                           | X61768                  |
|                         | <i>Nasonia vitripennis</i>             | B                           | M84686                  |
|                         | <i>Onchocera volvulus</i>              | C                           | AF069069                |
|                         | <i>Dirofilaria immitis</i>             | C                           | Z49261                  |
|                         | <i>Litomosa westi</i>                  | D                           | AJ548801                |
|                         | <i>Folsomia candida</i>                | E                           | AF179630                |
|                         | <i>Mansonella ozzardi</i>              | F                           | AJ279034                |
|                         | <i>Dipetalonema gracile</i>            | J                           | AJ548802                |
|                         | <i>Rickettsia sp.</i>                  | Outgroup                    | U11021                  |



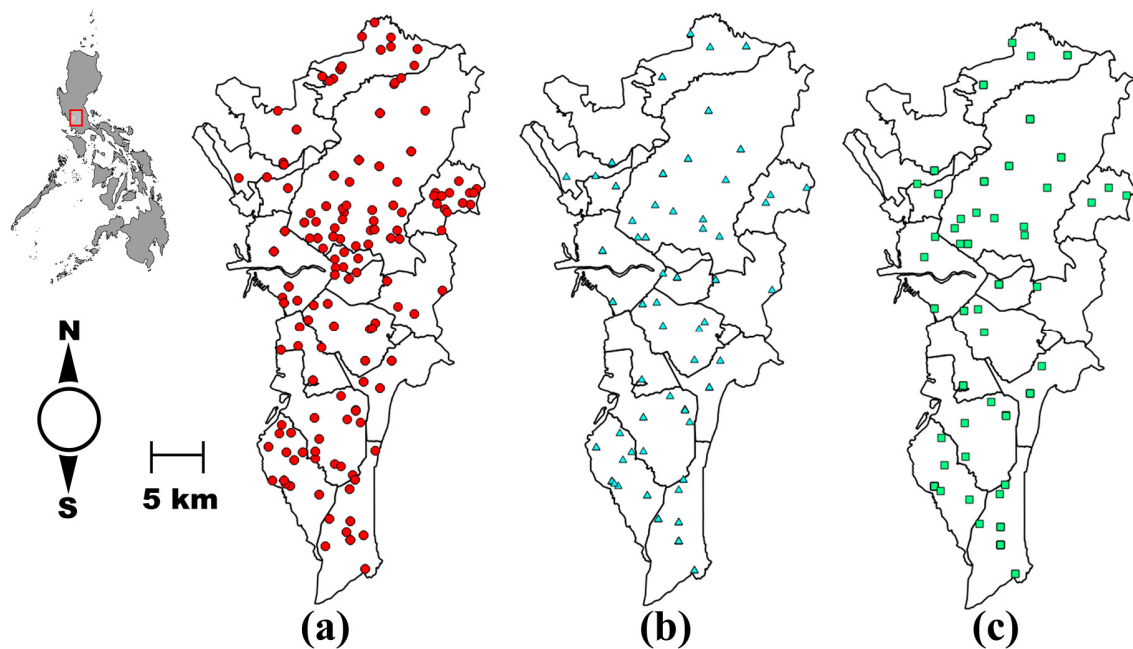

**Fig 1.** (a) Spatial distribution of the sampling sites (n=138) for collecting adult *Ae. aegypti*. *Wolbachia*-positive sampling sites based on *wsp* (b) and 16S rDNA (c). Details of the number of *Wolbachia*-positive mosquitoes per sampling site is found in the Table S1.

## RESULTS

### Detection of *Wolbachia* through *wsp* and its phylogeny

From a total of 672 adult *Ae. aegypti* screened, 113 (16.8%) individual adult mosquito samples are infected with *Wolbachia* using the *wsp* marker (Table 2). Based on the study's criterion (See methods), only 17 samples demonstrated one successful amplification, thus excluding them for further analysis. In addition, female/male ratio is 0.82 (Table 2). All sequenced amplicons resulted in a high degree of similarity (>98.0%) with deposited *wsp* sequences in GENBANK. The spatial distribution showed that 60 (43.0%) sampling sites (Figure 1b) contained *Wolbachia* positive mosquitoes with 1 – 8 individuals. Further analysis showed that the distribution of *wsp*-positive mosquito samples was significantly clustered ( $R = 0.003, p < 0.001$ ). Figure 2 and Figure S1 show the phylogeny of *Wolbachia* sequences based on *wsp* sequences. Majority of the sequences were found in supergroup B (n=84) while

the remaining were clustered in supergroup A (n=29). Based on descending order of sample sizes, sample sequences in supergroup B were identical (>99.0%) to *Wolbachia* type strains from selected hosts of *Ae. albopictus* (wAlbB) (n= 51), *Cu. quinquefasciatus*, *Cu. pipiens* (wPip), *Ae. aegypti* wMel strain (n= 23) and *Ephestia cautella* (wCau) (n= 10). The sample sequences from supergroup A were either similar (98.0-99.0%) (n = 8) or identical (>99.0%) (n= 21) to the type strain (wAlbA) from host *Ae. albopictus*.

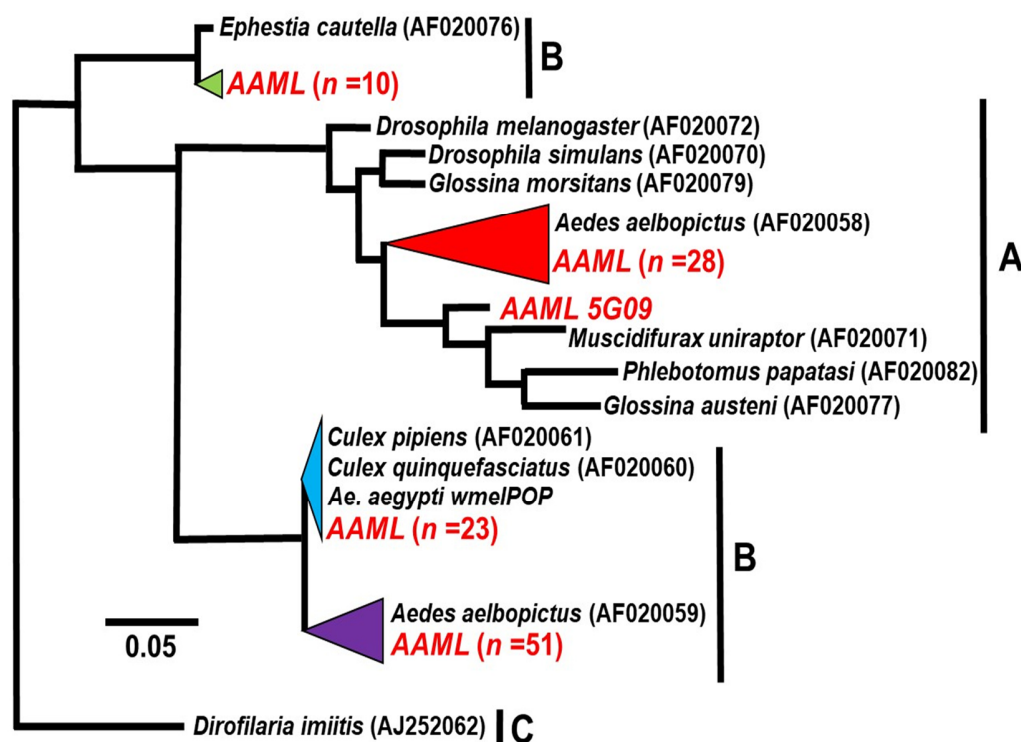

**Fig 2.** Phylogenetic analysis of *wsp*. The alignment was analyzed in PhyML. Sample sequences of *Ae.aegypti* collected in Metropolitan Manila are in red, labeled as AAML (*Ae. aegypti* Metropolitan Manila) and alphanumeric values indicate the unique code assigned to each *Ae. aegypti* individual sample. Merging (triangles) of sample and representative *Wolbachia* sequences was done to show degree of similarity (98-100%). Supergroups were indicated as A – C depending on the representative sequences used. The phylogenetic trees are re-drawn

for better visualization, thus an expanded version can be viewed in Supplemental Figure S1. Please refer to Table 1 for the *Wolbachia* type sequences (ingroup and outgroup) for both markers.

### Detection of *Wolbachia* through 16S rDNA and its phylogeny

For 16S rDNA, 89 (13.2%) individual adult mosquito samples were infected with *Wolbachia* (Table 2). 20 individual mosquito samples generated one successful 16S rDNA amplification, thus, excluding them for further analysis. Furthermore, female/male ratio is 0.85 (Table 2). 50 (36.0%) sampling sites (Figure 1c) contained *Wolbachia*-positive mosquitoes ranging from 1-8 individuals and the distribution of 16SrDNA-positive individuals revealed to be clustered or aggregated ( $R = 0.001, p < 0.001$ ). All sequenced amplicons resulted in a high degree of similarity (>98%) with deposited 16S rDNA *Wolbachia* sequences in GENBANK. Nearly all 16S rDNA sample sequences (n=85) (Figure 3, Figure S2) were grouped in supergroup B. Only one sample sequence was identical to *Nasonia vitripennis* while the remaining sample sequences were up to 99% similar from the selected hosts of the supergroup. The remaining sample sequences (n=4) were grouped in supergroup C & J. One sample sequence was highly similar (>99%) with *Dirofilaria immitis* while the remaining were 98-99% similar from the selected hosts of the supergroup.

### Comparison of 16S rDNA and *wsp* for *Wolbachia* detection and phylogeny

From the 113 and 89 positively detected mosquito individuals from *wsp* and 16S rDNA respectively, 80 (11.90%) individual samples yielded positive amplification in both markers (Table 2). In *wsp* positive detection (n=113), 80 had two successful amplification of the 16S rDNA marker while 27 had only one amplification of 16S rDNA and the remaining 6 had no successful amplification on 16S rDNA marker. On the other hand, the 89 individual samples deemed 16S rDNA positive for *Wolbachia* showed 80 individuals had two successful amplification of the *wsp* marker while 9 had only one successful amplification on the said marker. Next, we focus on the supergroup classification of the 80 individual samples based on the *wsp* and 16S rDNA phylogeny. It was shown that 55 (69%) had the same classification in supergroup B while the remaining 25 (31%) showed a disparity in

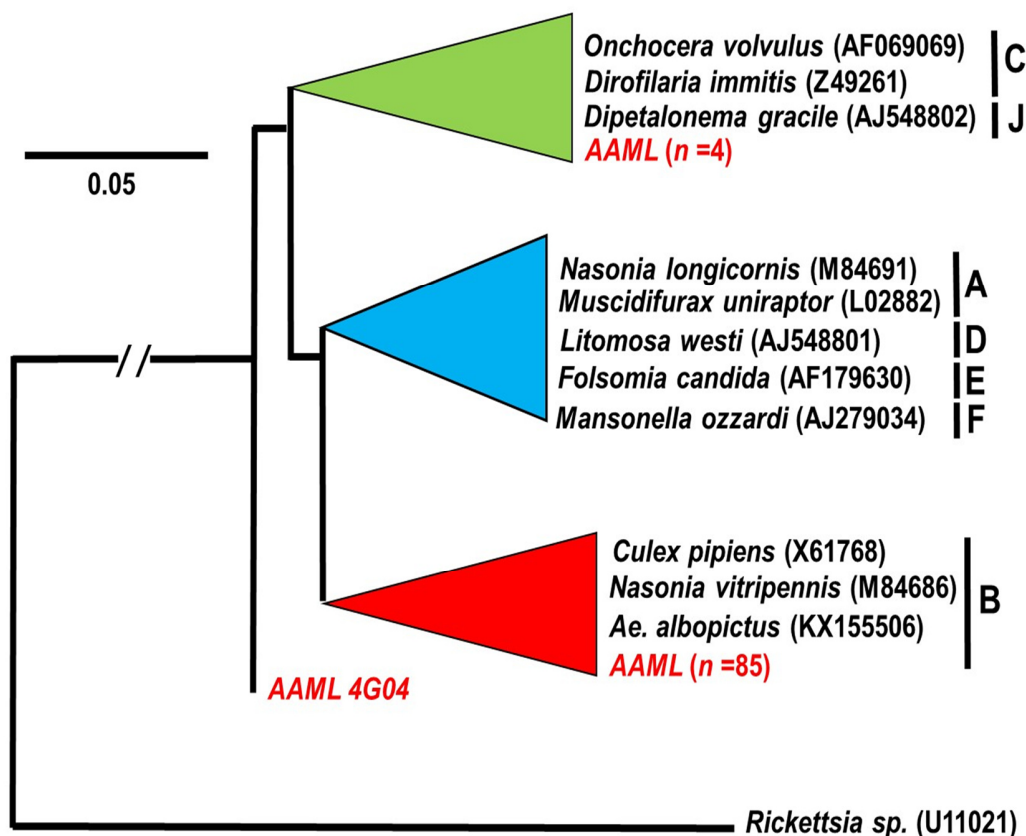

**Fig 3.** Phylogenic analysis of 16S rDNA. The alignment was analyzed in PhyML. Sample sequences of *Ae.aegypti* collected in Metropolitan Manila are in red, labeled as AAML (*Ae. aegypti* Metropolitan Manila) and alphanumeric values indicate the unique code assigned to each *Ae. aegypti* individual sample. Merging (triangles) of sample and representative *Wolbachia* sequences was done to show degree of similarity (98-100%). Supergroups were indicated as A – J depending on the representative sequences used. The phylogenetic trees are re-drawn for better visualization, thus an expanded version can be viewed in Supplemental Figure S2. Please refer to Table 1 for the *Wolbachia* type sequences (ingroup and outgroup) for both markers.

**Table 2.** Summary of *wsp* and 16S rDNA detection results in *Ae. aegypti*

| Molecular markers    | Number of individuals detected (n=672) | Female (n=379) | Male (n=293) | Female/Male ratio |
|----------------------|----------------------------------------|----------------|--------------|-------------------|
| <i>wsp</i>           | 113 (16.82%)                           | 52             | 61           | 0.82              |
| 16S rDNA             | 89 (13.24%)                            | 41             | 48           | 0.85              |
| <i>wsp</i> +16S rDNA | 80 (11.90%)                            | 36             | 44           | 0.82              |

## DISCUSSION

Our study was able to demonstrate the detection of the endosymbiont *Wolbachia* in field-caught adult *Ae. aegypti*. Notably, the main reason for the positive detection, especially in *wsp*, is because of the procedural modifications or optimization in the amplification of the said marker. A case in point, for example, why optimization is necessary is the evidence presented in the malaria mosquito vector, *An. gambiae*. Previous studies had reported no observed natural *Wolbachia* infection in this mosquito vector<sup>26-31</sup>; however, the endosymbiont was successfully detected in *An. gambiae* from Burkina Faso, West Africa using an optimized *wsp* protocol<sup>32,33</sup>. Another potential reason for a positive detection was the study's sample size. Based on several literature on assessing the prevalence of *Wolbachia* in different mosquito species, the highest number of *Ae. aegypti* individuals screened was 119<sup>30</sup> which resulted in non-detection of the endosymbiont. As compared to the actual study (n= 672), the sample sizes from previous studies were low; thus, larger sample size would provide a more accurate estimate of the prevalence of *Wolbachia* infection. Similarly, these reasons were clearly emphasized by recent studies on why earlier investigations may have underestimated the actual incidence of *Wolbachia* infection from different insect hosts<sup>48,49</sup>.

Our study acknowledges the uncertainties associated with conventional PCR detection such as high false positive detection rates. With this in mind, the study was cautious in affirming a positive infection in each *Ae. aegypti* adult sample. First, the selection of markers is based on the recommendation of Simoes et al.<sup>42</sup> that two of its preferred primer

sets (e.g. *Wspecf* and *Wspecr*) was determined to produce the lowest false positive and false negative rates. Secondly, our study performed replications with a stringent criterion for a successful *Wolbachia* infection on each mosquito sample. Although there are several genetic markers (e.g. MLST genes) and techniques (e.g. IFA, FISH or whole-genome sequencing) available, the primary intention of this study is to detect *Wolbachia* infection in *Ae. aegypti* initially using this PCR-Based approach.

Linking our findings with the previous studies<sup>35-37</sup> which reported *Wolbachia* in *Ae. aegypti* may incidentally provide a clear picture of its infection status. First, the probable density of the endosymbiont found in this mosquito vector may be low. Even though our study did not measure the actual density, a 40-cycle PCR amplification procedure or a long PCR run<sup>50</sup> may detect a small amount of *Wolbachia* present. It partly supports the results presented from metabarcoding studies<sup>36,37</sup> where a low number (2-4) of *Wolbachia* sequence reads were detected in both the larvae and adult *Ae. aegypti* mosquito. These can be another potential reason why earlier prevalence studies were not able to detect *Wolbachia* in *Ae. aegypti* samples. Moreover, the low probable density of the endosymbiont may also translate to the observed low infection rate (13-16%) found in our study. This again partly supports metabarcoding studies<sup>36,37</sup> where only two *Ae. aegypti* mosquito pools had the presence of these low number *Wolbachia* sequences. On the other hand, our results are in contrast with the report from *Ae. aegypti* larvae (n=16 individuals) in Malaysia which resulted in a 50% infection rate<sup>35</sup>. However, there could be some uncertainties to this estimate because of its small sample size and, more importantly, the collected larval samples may be siblings from the same female *Ae. aegypti* mosquito. The limitation as mentioned earlier prompted us to conduct an individual-based adult mosquito detection so that it can present a better and explicit estimation of the infection rate. Secondly, we assume that the *Wolbachia* strain/s found in *Ae. aegypti* can be maternally-inherited due to the following reasons: (a) reported positive infections in larval samples from the previous studies<sup>35-37</sup> and (b) detecting positive infections in male *Ae. aegypti* mosquitoes (our study, Table 2). However, there is still a need to present direct evidence of maternal transmission of this endosymbiont during the



developmental stages of *Ae. aegypti* since all studies, including ours, were performed independently.

Lastly, the *Wolbachia* strains infecting *Ae. aegypti* have been shown in our study belong to supergroups A and B. Both *wsp* and 16S rDNA phylogeny showed that majority of the individual samples belong to supergroup B while a small number of individual samples were found in supergroup A (based on *wsp*). Detecting different *Wolbachia* strains in a single mosquito species is relatively common especially in medically important mosquitoes, *Ae. albopictus*<sup>51,52</sup> and *An. gambiae*<sup>32</sup>, and other insect host species (e.g. *Drosophila* species<sup>51</sup>). Since our study presented a majority of our sample sequences belonging to supergroup B, this was also the same observation reported by previous studies<sup>35-37</sup>. Dipterans, especially mosquitoes, are commonly infected by these *Wolbachia* strains from supergroups, A and B. It has been shown to cause parasitism towards its insect host by producing phenotype effects such as cytoplasmic incompatibility, male killing, and feminization<sup>11,53</sup>. Nevertheless, whether the identified *Wolbachia* strains in *Ae. aegypti* possess these phenotypic effects remains unclear. Also, further studies are needed to ascertain the pathogenic impact of this local endosymbiont to the mosquito vector. More importantly, it is very essential to determine whether these identified *Wolbachia* strains could render *Ae. aegypti* a less effective vector by blocking key arboviruses such as dengue. It is also worth mentioning that some individual samples have shown to be similar with *Wolbachia* strains found in supergroups C and J based on 16S rDNA. These two supergroups are not generally found in dipterans especially in mosquitoes. It is likely that our 16S rDNA amplified the *Wolbachia* strain residing in the roundworm, *Dirofilaria immitis*. *Ae. aegypti* mosquitoes are also known to carry this parasitic nematode to certain mammals, such as dogs<sup>54</sup>. This observation was also reported in one of the metabarcoding studies<sup>37</sup> that showed sequences of *Wolbachia* from *Dirofilaria immitis*. However, when these 16S rDNA results were compared to the *wsp* results in our study, it showed the *Wolbachia wsp* sample sequence of the same mosquito individuals belong to supergroup B. We can only infer that the inconsistent results observed in our study may stem towards the sensitivity and specificity of the markers used. The *wsp* gene marker has been likened to antigen protein typing in screening pathogenic bacteria where it can be a perfect

diagnostic tool for detecting *Wolbachia* infection<sup>55,56</sup>. However, it is unsuitable for phylogenetic analysis or deeper taxonomic relationship because of its extensive recombination and strong diversifying selection<sup>11,57,58</sup>. 16S rDNA, on the other hand, is known to be a conserved gene highly suited in bacterial identification and phylogeny, but its use in detecting *Wolbachia* infection has demonstrated varying results depending on the specific 16S rDNA primers<sup>42</sup>. It was emphasized that “no single protocol” can ultimately ensure the specificity and accuracy of 16S rDNA to detect *Wolbachia* infection<sup>56</sup>. Thus, further claiming that 16S rDNA markers in *Wolbachia* detection may be far from optimal<sup>56</sup>.

We consider our findings to be crucially important especially if the Philippines would implement or approve two scenarios in the release of: (a) *Wolbachia*-infected (e.g. *wMelPop* or *wMel*) mosquitoes or (b) local *Wolbachia* strains found by our study in dengue-endemic areas. In the first scenario, a vital consideration is the presence of “bidirectional incompatibility” mechanism between the intended *Wolbachia* strain (e.g. *wMelPop* or *wMel*) to be released and the present local strain found in the mosquito. There are instances that two strains in one host cannot stably coexist with each other because the naturally occurring strain is preventing the intended strain to reach fixation or establishment<sup>59-61</sup>. It would serve as an impediment to the intentional spread of *Wolbachia* strain to the mosquito population. It was suggested that to overcome this incompatibility is to remove the existing natural strain inhabiting the mosquito vector or to perform a “superinfection” where the intended *Wolbachia* strain induces unidirectional incompatibility with the natural strain<sup>62</sup>. Nevertheless, it very important to re-examine the infection status of *Wolbachia* in *Ae. aegypti* mosquitoes in intended areas prior a mass release program. If the second scenario, utilizing the release of local *Wolbachia* strains, is implemented, there are specific considerations that should be addressed for a successful population replacement. The first and most important consideration is to determine whether these local strains may exhibit the same phenotypic effects and pathogen blocking of *wMel* strain to *Ae. aegypti*. Currently, these characteristics are still unknown and therefore crucial if utilized for mass release. Another consideration is endosymbiont’s density in the mosquito vector. Mosquito species naturally infected with *Wolbachia* are not ideal candidates due to the changing molecular interactions between



*Wolbachia* and the host over time<sup>63</sup>. The result of this symbiosis is the amount of bacterial density found in the mosquito host where it can influence the intensity of *Wolbachia*-induced phenotypic or anti-viral effects<sup>22,62,64,65</sup>. Newer infections (e.g. transinfections) are shown to produce high bacterial density while natural infections lead to lower bacterial density due to the adaptation of the host to the endosymbiont infection over time. In our study, we infer that the local *Wolbachia* strains are in low density inside its host, *Ae. aegypti*. If this is the case, it will result in a reduced physiological and anti-viral impact of the strain to the mosquito vector. However, high *Wolbachia* density which also possesses strong inhibitory effects against insect viruses had been observed from natural *Wolbachia* strains with a long-term association from its host<sup>66,67</sup>. The last consideration is the low infection rate. It raises the question, more importantly to the population replacement approach, if any of the local *Wolbachia* strains could be sustained for an extended period or possess the ability to infect the mosquito population thoroughly. Studies had suggested that a successful strain used in population replacement or invasion should reach an infection rate of >90% and should remain at this rate over an extended period of time<sup>68-70</sup>. Thus, utmost consideration in the infection status of *Wolbachia* and its role in *Ae. aegypti* is necessary for a *Wolbachia*-based vector control program to be successful, efficient and, as well as, effective.

## ACKNOWLEDGEMENTS

We would like to thank M.J.L.B. Martinez, J.D.R. Capistrano, V.S.P. Tiopianco, B.M.C Orantia, C.R. Estrada, M.G. Cuenca, K.M. Viacrusis and L.F.T. Hernandez for their valuable work in the collection of the mosquitoes. Also we are grateful to the valuable and pertinent comments of the anonymous reviewers. This work is funded by the JSPS Grant-in-Aid for Scientific Research (16H05750, 17H01624, 17K18906), JSPS Bilateral Joint Research Projects, and Leading Academia in Marine and Environmental Pollution Research – Ehime University (Y29-1-8)

## AUTHOR CONTRIBUTIONS

T.M.C., D.M.A. and K.W. designed the experiments. T.M.C., K.H., and R.K.H. performed the experiments. T.M.C., K.H., and R.K.H. performed the sequencing while T.M.C., K.W. and D.M.A. accomplished the phylogenetic analysis. T.M.C. wrote the manuscript along with D.M.A and K.W. All authors reviewed the manuscript and approved on its submission.

## REFERENCES

1. Juliano, Steven A., and L. Philip Lounibos. Ecology of invasive mosquitoes: effects on resident species and on human health. *Ecology letters* 8.5: 558-574 (2005).
2. Powell, Jeffrey R., and Walter J. Tabachnick. History of domestication and spread of *Aedes aegypti*-A Review. *Memorias do Instituto Oswaldo Cruz* 108: 11-17 (2013).
3. Morrison, Amy C., et al. Defining challenges and proposing solutions for control of the virus vector *Aedes aegypti*. *PLoS medicine* 5.3: e68 (2008).
4. Stanaway JD, Shepard DS, Undurraga EA, Halasa YA, Coffeng LE, Brady OJ, Hay SI, Bedi N, Bensenor IM, Castañeda-Orjuela CA, Chuang TW. The global burden of dengue: an analysis from the Global Burden of Disease Study. *The Lancet infectious diseases*. 2016 Jun 30;16(6):712-23 (2013)
5. Achee NL, Gould F, Perkins TA, Reiner Jr RC, Morrison AC, Ritchie SA, Gubler DJ, Teyssou R, Scott TW. A critical assessment of vector control for dengue prevention. *PLoS neglected tropical diseases*. May 7;9(5):e0003655 (2015).
6. Reiner Jr RC, Achee N, Barrera R, Burkot TR, Chadee DD, Devine GJ, Endy T, Gubler D, Hombach J, Kleinschmidt I, Lenhart A. Quantifying the epidemiological impact of vector control on dengue. *PLoS neglected tropical diseases*. May 26;10(5):e0004588 (2016).
7. Kamtchum-Tatuene J, Makepeace BL, Benjamin L, Baylis M, Solomon T. The potential role of *Wolbachia* in controlling the transmission of emerging human arboviral infections. *Current opinion in infectious diseases*. Feb;30(1):108 (2017).

8. Murray JV, Jansen CC, De Barro P. Risk associated with the release of Wolbachia-infected *Aedes aegypti* mosquitoes into the environment in an effort to control dengue. *Frontiers in public health*.;4 (2016).
9. Bourtzis K, Dobson SL, Xi Z, Rasgon JL, Calvitti M, Moreira LA, Bossin HC, Moretti R, Baton LA, Hughes GL, Mavingui P. Harnessing mosquito–Wolbachia symbiosis for vector and disease control. *Acta tropica*. Apr 30;132:S150-63 (2014).
10. Serbus LR, Casper-Lindley C, Landmann F, Sullivan W. The genetics and cell biology of Wolbachia-host interactions. *Annual review of genetics*. Dec 1;42:683-707 (2008).
11. Werren JH, Baldo L, Clark ME. Wolbachia: master manipulators of invertebrate biology. *Nature reviews. Microbiology*. Oct 1;6(10):741 (2008).
12. Saridaki A, Bourtzis K. Wolbachia: more than just a bug in insects genitals. *Current opinion in microbiology*. Feb 28;13(1):67-72 (2010).
13. Rasgon JL. Using predictive models to optimize Wolbachia-based strategies for vector-borne disease control. *Transgenesis and the Management of Vector-Borne Disease*.:114-25 (2008).
14. Glowska, Eliza, Anna Dragun-Damian, Mirosława Dabert, and Michael Gerth. "New Wolbachia supergroups detected in quill mites (Acari: Symbionidae)." *Infection, Genetics and Evolution* 30: 140-146 (2015).
15. Ahmed MZ, Breinholt JW, Kawahara AY. Evidence for common horizontal transmission of Wolbachia among butterflies and moths. *BMC evolutionary biology*. 2016 May 27;16(1):118.
16. McMeniman CJ, Lane RV, Cass BN, Fong AW, Sidhu M, Wang YF, O'Neill SL. Stable introduction of a life-shortening Wolbachia infection into the mosquito *Aedes aegypti*. *Science*. 2009 Jan 2;323(5910):141-4.
17. Xi Z, Khoo CC, Dobson SL. Wolbachia establishment and invasion in an *Aedes aegypti* laboratory population. *Science*. 2005 Oct 14;310(5746):326-8.

18. Min, Kyung-Tai, and Seymour Benzer. "Wolbachia, normally a symbiont of *Drosophila*, can be virulent, causing degeneration and early death." *Proceedings of the National Academy of Sciences* 94, no. 20: 10792-10796 (1997).
19. Dutra HL, Rocha MN, Dias FB, Mansur SB, Caragata EP, Moreira LA. Wolbachia blocks currently circulating Zika virus isolates in Brazilian *Aedes aegypti* mosquitoes. *Cell host & microbe*. 2016 Jun 8;19(6):771-4.
20. Aliota MT, Walker EC, Yepes AU, Velez ID, Christensen BM, Osorio JE. The wMel strain of Wolbachia reduces transmission of chikungunya virus in *Aedes aegypti*. *PLoS neglected tropical diseases*. 2016 Apr 28;10(4):e0004677.
21. Frentiu FD, Zakir T, Walker T, Popovici J, Pyke AT, van den Hurk A, McGraw EA, O'Neill SL. Limited dengue virus replication in field-collected *Aedes aegypti* mosquitoes infected with Wolbachia. *PLoS neglected tropical diseases*. 2014 Feb 20;8(2):e2688.
22. Walker TJ, Johnson PH, Moreira LA, Iturbe-Ormaetxe I, Frentiu FD, McMeniman CJ, Leong YS, Dong Y, Axford J, Kriesner P, Lloyd AL. The wMel Wolbachia strain blocks dengue and invades caged *Aedes aegypti* populations. *Nature*. 2011 Aug 25;476(7361):450-3.
23. Popovici J, Moreira LA, Poinsignon A, Iturbe-Ormaetxe I, McNaughton D, O'Neill SL. Assessing key safety concerns of a Wolbachia-based strategy to control dengue transmission by *Aedes* mosquitoes. *Memorias do Instituto Oswaldo Cruz*. 2010 Dec;105(8):957-64.
24. De Barro PJ, Murphy B, Jansen CC, Murray J. The proposed release of the yellow fever mosquito, *Aedes aegypti* containing a naturally occurring strain of Wolbachia pipientis, a question of regulatory responsibility. *Journal für Verbraucherschutz und Lebensmittelsicherheit*. 2011 May 1;6(1):33-40.
25. Iturbe-Ormaetxe I, Walker T, LO'Neill S. Wolbachia and the biological control of mosquito-borne disease. *EMBO reports*. 2011 Jun 1;12(6):508-18.

26. Kittayapong P, Baisley KJ, Baimai V, O'Neill SL. Distribution and diversity of Wolbachia infections in Southeast Asian mosquitoes (Diptera: Culicidae). *Journal of medical entomology*. 2000 May;37(3):340-5.
27. Ricci I, Cancrini G, Gabrielli S, D'amelio S, Favia G. Searching for Wolbachia (Rickettsiales: Rickettsiaceae) in mosquitoes (Diptera: Culicidae): large polymerase chain reaction survey and new identifications. *Journal of medical entomology*. 2002 Jul;39(4):562-7.
28. Rasgon JL, Scott TW. Impact of population age structure on Wolbachia transgene driver efficacy: ecologically complex factors and release of genetically modified mosquitoes. *Insect biochemistry and molecular biology*. 2004 Jul 31;34(7):707-13.
29. Hilgenboecker K, Hammerstein P, Schlattmann P, Telschow A, Werren JH. How many species are infected with Wolbachia?—a statistical analysis of current data. *FEMS microbiology letters*. 2008 Apr 1;281(2):215-20.
30. Wiwatanaratnabutr I. Geographic distribution of wolbachial infections in mosquitoes from Thailand. *Journal of invertebrate pathology*. 2013 Nov 30;114(3):337-40.
31. Nugapola NN, De Silva WP, Karunaratne SP. Distribution and phylogeny of Wolbachia strains in wild mosquito populations in Sri Lanka. *Parasites & vectors*. 2017 May 10;10(1):230.
32. Baldini F, Segata N, Pompon J, Marcenac P, Shaw WR, Dabiré RK, Diabaté A, Levashina EA, Catteruccia F. Evidence of natural Wolbachia infections in field populations of *Anopheles gambiae*. *Nature communications*. 2014 Jun 6;5.
33. Shaw WR, Marcenac P, Childs LM, Buckee CO, Baldini F, Sawadogo SP, Dabiré RK, Diabaté A, Catteruccia F. Wolbachia infections in natural *Anopheles* populations affect egg laying and negatively correlate with *Plasmodium* development. *Nature communications*. 2016;7.
34. Gomes FM, Hixson BL, Tyner MD, Ramirez JL, Canepa GE, e Silva TL, Molina-Cruz A, Keita M, Kane F, Traoré B, Sogoba N. Effect of naturally occurring Wolbachia in *Anopheles gambiae* sl mosquitoes from Mali on *Plasmodium*

falciparum malaria transmission. Proceedings of the National Academy of Sciences. 2017 Nov 7;201716181.

35. Teo CH, Lim PK, Voon K, Mak JW. Detection of dengue viruses and Wolbachia in *Aedes aegypti* and *Aedes albopictus* larvae from four urban localities in Kuala Lumpur, Malaysia. Tropical Biomedicine. 2017 Sep 1;34(3):583-97.

36. Coon KL, Brown MR, Strand MR. Mosquitoes host communities of bacteria that are essential for development but vary greatly between local habitats. Molecular ecology. 2016 Nov 1;25(22):5806-26.

37. Thongsripong P, Chandler JA, Green AB, Kittayapong P, Wilcox BA, Kapan DD, Bennett SN. Mosquito vector-associated microbiota: Metabarcoding bacteria and eukaryotic symbionts across habitat types in Thailand endemic for dengue and other arthropod-borne diseases. Ecology and evolution. 2018 Jan 1;8(2):1352-68.

38. Carvajal TM, Viacrusis KM, Hernandez LF, Ho HT, Amalin DM, Watanabe K. Machine learning methods reveal the temporal pattern of dengue incidence using meteorological factors in metropolitan Manila, Philippines. BMC infectious diseases. 2018 Dec;18(1):183.

39. Rueda LM. Pictorial keys for the identification of mosquitoes (Diptera: Culicidae) associated with dengue virus transmission. Walter Reed Army Inst Of Research Washington Dc Department Of Entomology; 2004 Aug 3.

40. Crane S. DNA Extraction From Archival Museum Insect Specimens. 2011. Accessed Mar 2015. Available from: <https://s3-eu-west-1.amazonaws.com/pfigshare-u-files/1114092/extractionmuseum.pdf>

41. Zhou W, Rousset F, O'Neill S. Phylogeny and PCR-based classification of Wolbachia strains using wsp gene sequences. Proceedings of the Royal Society of London B: Biological Sciences. 1998 Mar 22;265(1395):509-15

42. Simoes PM, Mialdea G, Reiss D, Sagot MF, Charlat S. Wolbachia detection: an assessment of standard PCR protocols. Molecular Ecology Resources. 2011 May 1;11(3):567-72.

43. Tamura K, Stecher G, Peterson D, Filipski A, Kumar S. MEGA6: molecular evolutionary genetics analysis version 6.0. *Molecular biology and evolution*. 2013 Dec 1;30(12):2725-9.
44. Guindon S, Dufayard J, Lefort V, Anisimova M, Hordijk W, Gascuel O. New algorithms and methods to estimate maximum-likelihood phylogenies: assessing the performance of PhyML 3.0. *Syst Biol*. 2010;59(3):307–21.
45. Lefort V, Longueville JE, Gascuel O. SMS: Smart Model Selection in PhyML. *Molecular Biology and Evolution*. 2017 May 11:msx149.
46. R Development Core Team. R: A language and environment for statistical computing. R Foundation for Statistical Computing, Vienna, Austria. 2016
47. Baddeley A, Turner R. Spatstat: an R package for analyzing spatial point patterns. *Journal of statistical software*. 2005 Jan 26;12(6):1-42.
48. Augustinos AA, Santos-Garcia D, Dionyssopoulou E, Moreira M, Papapanagiotou A, Scarvelakis M, Doudoumis V, Ramos S, Aguiar AF, Borges PA, Khadem M. Detection and characterization of Wolbachia infections in natural populations of aphids: is the hidden diversity fully unraveled?. *PloS one*. 2011 Dec 13;6(12):e28695.
49. Ahmed MZ, Breinholt JW, Kawahara AY. Evidence for common horizontal transmission of Wolbachia among butterflies and moths. *BMC evolutionary biology*. 2016 May 27;16(1):118.
50. Jeyaprakash A, Hoy MA. Long PCR improves Wolbachia DNA amplification: wsp sequences found in 76% of sixty-three arthropod species. *Insect molecular biology*. 2000 Aug 1;9(4):393-405.
51. Zhou W, Rousset F, O'Neill S. Phylogeny and PCR-based classification of Wolbachia strains using wsp gene sequences. *Proceedings of the Royal Society of London B: Biological Sciences*. 1998 Mar 22;265(1395):509-15.
52. Kitrayapong P, Baimai V, O'Neill SL. Field prevalence of Wolbachia in the mosquito vector *Aedes albopictus*. *The American journal of tropical medicine and hygiene*. 2002 Jan 1;66(1):108-11.



53. Ellegaard KM, Klasson L, Näslund K, Bourtzis K, Andersson SG. Comparative genomics of Wolbachia and the bacterial species concept. *PLoS genetics*. 2013 Apr 4;9(4):e1003381.
54. Kramer L, Grandi G, Leoni M, Passeri B, McCall J, Genchi C, Mortarino M, Bazzocchi C. Wolbachia and its influence on the pathology and immunology of *Dirofilaria immitis* infection. *Veterinary parasitology*. 2008 Dec 10;158(3):191-5.
55. Kageyama D, Narita S, Imamura T, Miyanoshita A. Detection and identification of Wolbachia endosymbionts from laboratory stocks of stored-product insect pests and their parasitoids. *Journal of stored products research*. 2010 Jan 31;46(1):13-9.
56. Perez-Losada M, Viscidi RP, Demma JC, Zenilman J, Crandall KA. Population genetics of *Neisseria gonorrhoeae* in a high-prevalence community using a hypervariable outer membrane porB and 13 slowly evolving housekeeping genes. *Molecular biology and evolution*. 2005 Sep 1;22(9):1887-902.
57. Werren JH, Bartos JD. Recombination in Wolbachia. *Current Biology*. 2001 Mar 20;11(6):431-5.
58. Jiggins FM. The rate of recombination in Wolbachia bacteria. *Molecular Biology and Evolution*. 2002 Sep 1;19(9):1640-3.
59. Hoffmann AA, Iturbe-Ormaetxe I, Callahan AG, Phillips BL, Billington K, Axford JK, Montgomery B, Turley AP, O'Neill SL. Stability of the wMel Wolbachia infection following invasion into *Aedes aegypti* populations. *PLoS neglected tropical diseases*. 2014 Sep 11;8(9):e3115.
60. Hoffmann AA, Montgomery BL, Popovici J, Iturbe-Ormaetxe I, Johnson PH, Muzzi F, et al. Successful establishment of Wolbachia in *Aedes* populations to suppress dengue transmission. *Nature*. 2011;476(7361):454–U107.
61. Hedges LM, Brownlie JC, O'Neill SL, Johnson KN. Wolbachia and virus protection in insects. *Science*. 2008 Oct 31;322(5902):702-.
62. Joubert DA, Walker T, Carrington LB, De Bruyne JT, Kien DH, Hoang NL, Chau NV, Iturbe-Ormaetxe I, Simmons CP, O'Neill SL. Establishment of a Wolbachia



- superinfection in *Aedes aegypti* mosquitoes as a potential approach for future resistance management. *PLoS pathogens*. 2016 Feb 18;12(2):e1005434.
63. Dale C, Moran NA. Molecular interactions between bacterial symbionts and their hosts. *Cell*. 2006 Aug 11;126(3):453-65.
64. Osborne SE, Iturbe-Ormaetxe I, Brownlie JC, O'Neill SL, Johnson KN. Antiviral protection and the importance of *Wolbachia* density and tissue tropism in *Drosophila simulans*. *Applied and environmental microbiology*. 2012 Oct 1;78(19):6922-9.
65. Martinez J, Longdon B, Bauer S, Chan YS, Miller WJ, Bourtzis K, Teixeira L, Jiggins FM. Symbionts commonly provide broad spectrum resistance to viruses in insects: a comparative analysis of *Wolbachia* strains. *PLoS pathogens*. 2014 Sep 18;10(9):e1004369.
66. Teixeira L, Ferreira Á, Ashburner M. The bacterial symbiont *Wolbachia* induces resistance to RNA viral infections in *Drosophila melanogaster*. *PLoS biology*. 2008 Dec 23;6(12):e1000002.
67. Hedges LM, Brownlie JC, O'Neill SL, Johnson KN. *Wolbachia* and virus protection in insects. *Science*. 2008 Oct 31;322(5902):702-.
68. Frentiu FDZ, Walker T, Popovici T, Pyke J, Van den Hurk AT, McGraw A, et al. Limited dengue virus replication in field-collected *Aedes aegypti* mosquitoes infected with *Wolbachia*. *PLoS Negl Trop Dis*. 2014;8:e2688.
69. Laven H. In: in *Genetics of Insect Vectors of Disease*. Wright R, Pal R, editors. Amsterdam: Elsevier; 1967. pp. 251–275.
70. Blagrove MS, Arias-Goeta C, Failloux AB, Sinkins SP. *Wolbachia* strain wMel induces cytoplasmic incompatibility and blocks dengue transmission in *Aedes albopictus*. *Proceedings of the National Academy of Sciences*. 2012 Jan 3;109(1):255-60.

## COMPETING INTEREST

The authors declare no competing interest

## DATA AVAILABILITY

Demographic profiles (location and sex) and detection status from each individual *Ae. aegypti* adult mosquito used in the study are presented in the Supplementary. Accession numbers of Nucleotide sequences of PCR-amplified fragments of *wsp* and *16S* have been deposited in the GENBANK nucleotide database under accession numbers \_\_\_\_\_to \_\_\_\_\_ and \_\_\_\_\_ to \_\_\_\_\_ respectively.

## SUPPLEMENTAL MATERIAL

**Table S1.** Demographic profile (Sex, Sampling Site Code, Location), Detection status (*wsp* and 16S rDNA) of all individual adult *Aedes aegypti* mosquitoes used in the study. Positive *Wolbachia* infection in mosquito samples presents the supergroup classification and GENBANK accession number.

**Figure S1.** Complete *wsp* phylogeny of *Wolbachia* from *Ae. aegypti* (n=113). The alignment was analyzed in the program PHYML and *Wolbachia* host *Dirofilaria immitis* was selected as an outgroup. All sample sequences are indicated in red dots. The condensed version of this tree is presented as Figure 1.

**Figure S2.** Complete *16S* rDNA phylogeny of *Wolbachia* from *Ae. aegypti* (n=85). The alignment was analyzed in the program PHYML and *Rickettsia sp.* was selected as an outgroup. All sample sequences are indicated in red dots. The condensed version of this tree is presented as Figure 2
